# Supplementary material for: Candidate Gene Association Studies in Atopic Dermatitis in Participants of European and Asian Ancestry: A Systematic Review and Meta-Analysis
Source: Preprints.org preprint supplement (doi:10.20944/preprints202306.1504.v1), 2023-06-21
Supplement: Supplementary file 1 [file supplementary]

## Sheet: Supplementary Table 1
Gene	SNP	OR	lower CI	upper CI	I-squared
FLG	rs558269137	0.28	0.21	0.36	0.705
FLG	rs61816761	0.25	0.19	0.33	0.663
FLG	rs138726443	0.27	0.18	0.4	0.132
FLG	rs150597413	0.32	0.21	0.5	0
FLG	Combined_1	0.19	0.13	0.27	0.687
FLG	Combined_2	0.33	0.17	0.63	0.368
FLG	Combined_3	0.23	0.15	0.36	0.81
FLG	rs397507563	0.14	0.03	0.69	0
TLR2	rs5743708	0.61	0.29	1.3	0.307
TLR2	rs4696480	0.81	0.62	1.06	0.402
IL10	rs1800896	1.06	0.89	1.27	0.296
IL10	rs1800871_rs1800872	1.08	0.72	1.64	0.767
11q13.5	rs7927894	0.78	0.71	0.85	0
IL13	rs1800925	0.6	0.48	0.75	0
IL4	rs2243250	0.81	0.59	1.13	0.035
IL4	rs2243248	2.67	1.53	4.65	0
HRNR	rs877776	0.91	0.62	1.34	0.729
IL6	rs1800795_rs1800797	1.08	0.89	1.31	0.167
IL18	rs187238	3.54	2.32	5.42	0.382
TGFB1	rs1800471	0.22	0.13	0.35	0
TGFB1	rs1800470	1.08	0.73	1.59	0.296
VDR	rs2228570	0.88	0.7	1.1	0
VDR	rs7975232	0.83	0.67	1.03	0
VDR	rs1544410_rs731236	1.22	0.98	1.51	0.347
IL1B	rs16944	0.8	0.61	1.04	0
IL1B	rs1143634	1.14	0.84	1.54	0
TNF	rs1800629	0.94	0.64	1.37	0
TNF	rs361525	1.21	0.62	2.37	0
SPINK5	rs2303067	1.04	0.73	1.48	0.708
IL4RA	rs1801275	1.1	0.77	1.55	0
TLR4	rs4986790_rs4986791	0.74	0.49	1.09	0
GSTP1	rs1695	1.05	0.82	1.35	0

## Sheet: Supplementary Table 2
Gene	SNP	OR	lower CI	upper CI	I-squared
FLG	rs200519781	0.32	0.25	0.42	0
FLG	rs121909626	0.19	0.11	0.34	0
FLG	rs61816761	0.45	0.11	1.74	0
FLG	rs761212672	0.14	0.04	0.44	0
FLG	S2889X	0.14	0.07	0.27	0
FLG	rs146466242	0.54	0.21	1.38	0.017
FLG	rs772851618	2.39	0.54	10.53	0
FLG	rs145738429	0.23	0.06	0.89	0
FLG	rs558269137	0.43	0.24	0.79	0
FLG	rs11584340	0.8	0.44	1.47	0.865
FLG	Combined	0.11	0.06	0.19	0
IL4	rs2243250_rs2070874	0.97	0.64	1.48	0.88
SPINK5	rs2303064	0.97	0.79	1.19	0
SPINK5	rs2303063_rs2303067	1.26	1.06	1.48	0
SPINK5	rs2303070	0.65	0.51	0.83	0
SPINK5	rs2303065	0.74	0.57	0.96	0
IL10	rs1800871_rs1800872	0.92	0.8	1.06	0
IL10	rs1800896	0.91	0.72	1.15	0
IL4RA	rs1801275	0.98	0.68	1.41	0.605
IL4RA	rs1805010	0.73	0.43	1.25	0.831
IL13	rs20541	0.9	0.68	1.21	0.686
IL13	rs1800925	0.71	0.46	1.11	0.705
IL12RB1	rs393548	0.8	0.66	0.96	0
IL12RB1	rs436857	0.79	0.65	0.95	0
IL5RA	rs334809	0.73	0.4	1.35	0.859
IL9	rs31563	1.32	1.07	1.64	0
IL18	rs187238	1.52	0.96	2.42	0
MIF	rs755622	0.65	0.49	0.86	0
TNF	rs1800629	1.61	0.61	4.26	0.825
FCER1A	rs2427837	0.89	0.26	3.07	0.89
TARC	431C>T	0.83	0.66	1.03	0
